# Supplementary material for: High-performance double ion-buffering reservoirs of asymmetric supercapacitors based on flower-like Co3O4-G>N-PEGm microspheres and 3D rGO-CNT>N-PEGm aerogels
Source: Royal Society of Chemistry journal article supplement (doi:10.1039/c8nr05865b), 2018-01-01
Supplement: c8nr05865b1.pdf [file c8nr05865b1.pdf]

## Supporting Information

### **High-Performance Double Ion-buffering Reservoirs of Asymmetric Supercapacitors Based on Flower-like $\text{Co}_3\text{O}_4$ -G>N- PEGm Microspheres and 3D rGO-CNT>N-PEGm Aerogels**

Changwei Lai,<sup>ab</sup> Ying Sun,<sup>a</sup> Xueqin Zhang,<sup>a</sup> Hong Yang,<sup>a</sup> and Baoping Lin<sup>\*a</sup>

<sup>a</sup>School of Chemistry and Chemical Engineering, Southeast University, Nanjing, 211189, P. R. China

<sup>b</sup>Anyang Institute of Technology, Anyang, 455000, P. R. China.

\* Corresponding author

E-mail: lbp@seu.edu.cn

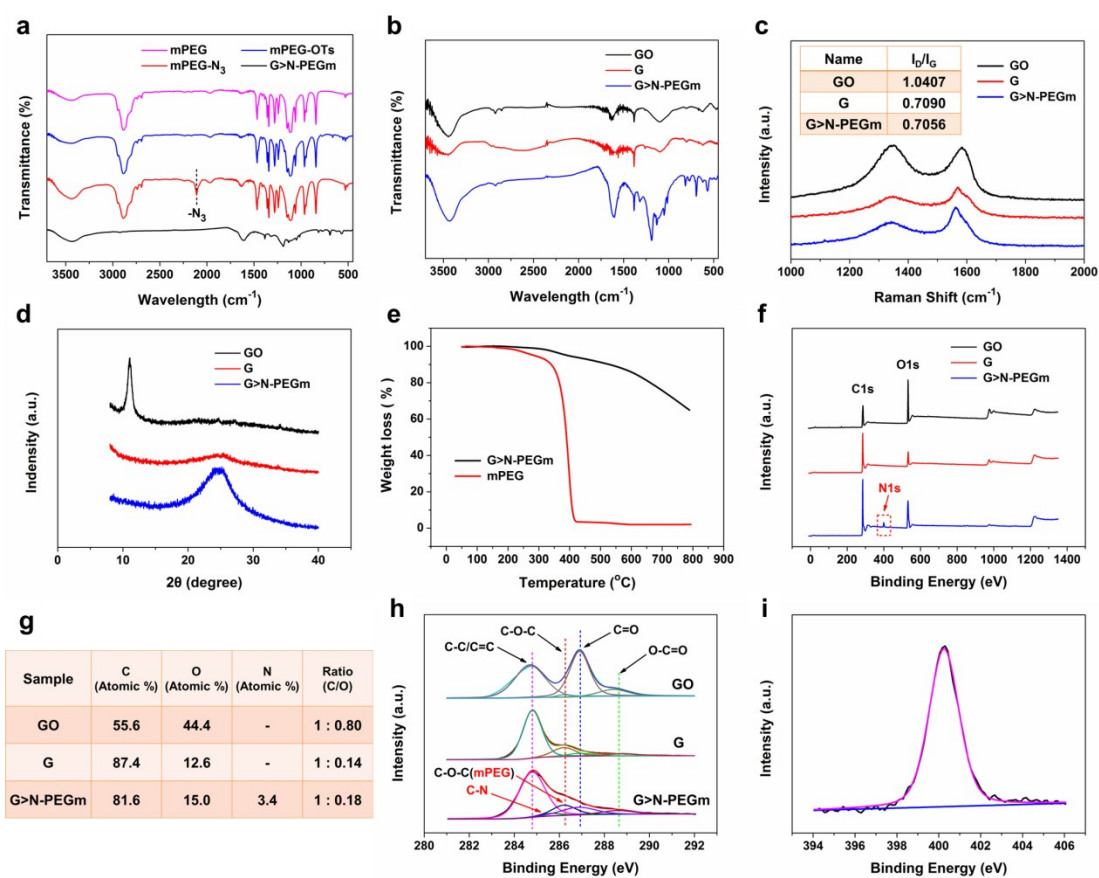

**Figure S1.** (a-b) FT-IR spectra of mPEG, mPEG-OTs, mPEG-N<sub>3</sub>, G>N-PEGm, GO and G. (c) Raman spectra of GO, G and G>N-PEGm (the inset shows the ratio of I<sub>D</sub>/I<sub>G</sub>). (d) XRD patterns of GO, G and G>N-PEGm. (e) TGA curves of G>N-PEGm and mPEG in N<sub>2</sub>. (f) The fully scanned XPS spectra, (g) the C/O ratio and (h) C 1s high-resolution XPS spectra of GO, G and G>N-PEGm. (i) N 1s high-resolution XPS spectrum of G>N-PEGm

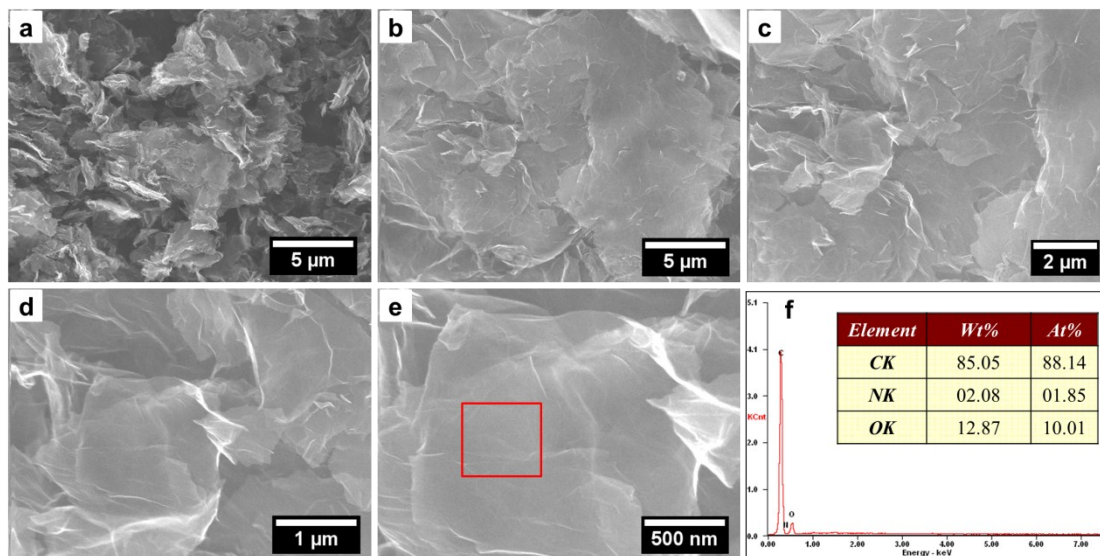

**Figure S2.** (a-e) Different magnification SEM images of G>N-PEGm nanosheets. (f) EDS spectrum of G>N-PEGm (the inset shows the ratio of elements).

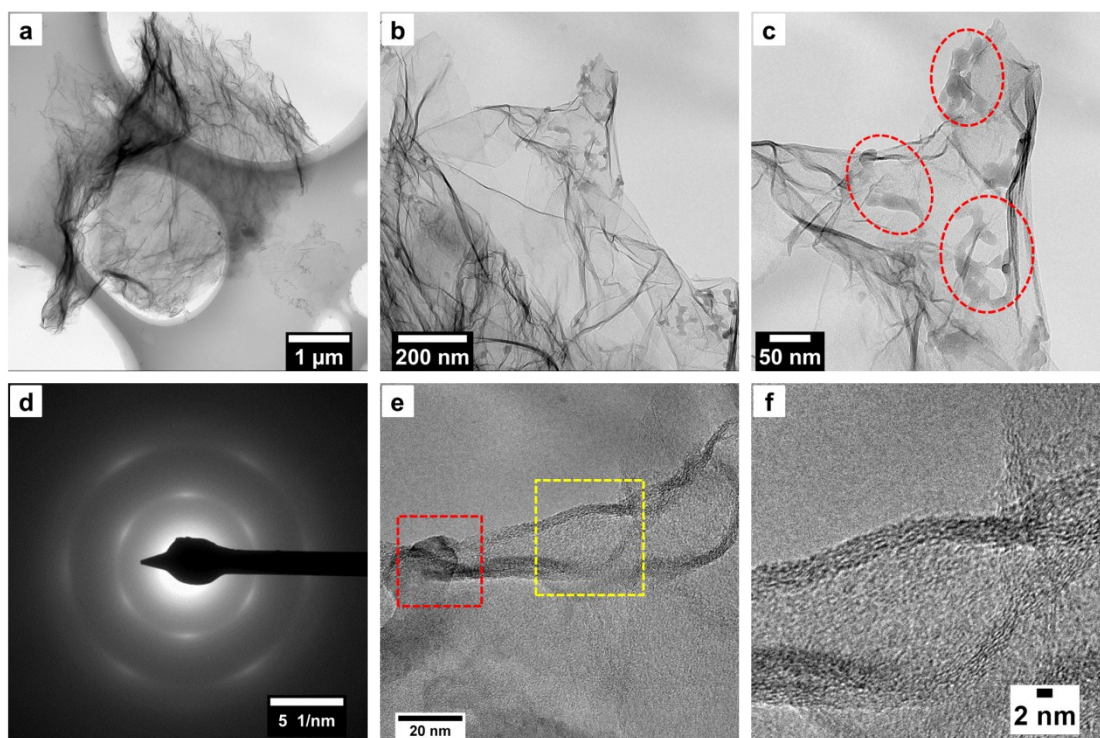

**Figure S3.** (a-c) Different magnification TEM images of G>N-PEGm nanosheets (the red rings in figure S3c show the aggregation of PEG polymer chains on the surface of the grapheme nanosheets). (d) SAED patterns and (e-f) HRTEM images of G>N-PEGm nanosheets.

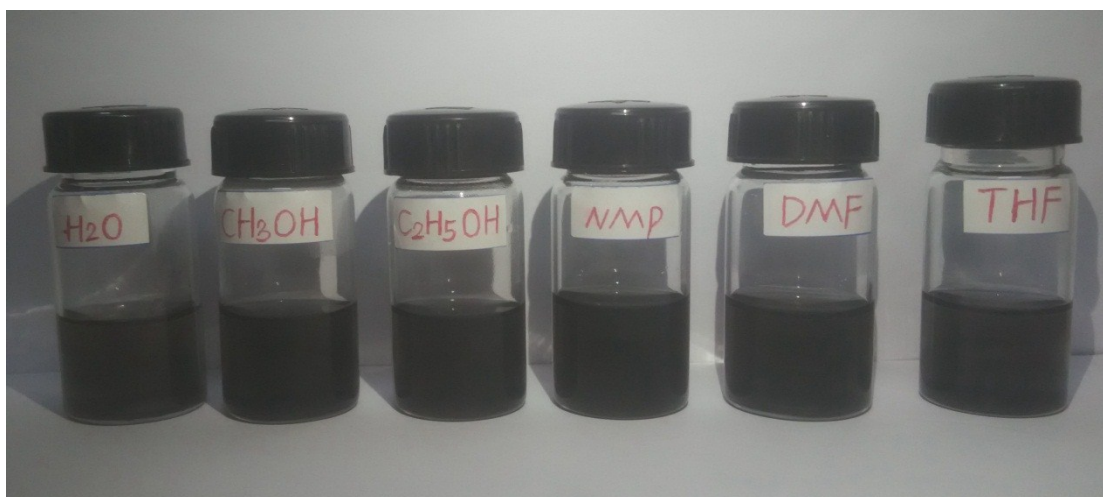

**Figure S4.** Photographs of G>N-PEGm nanosheets dispersed in water, methanol, ethanol, NMP, DMF and THF (respectively from left to right).

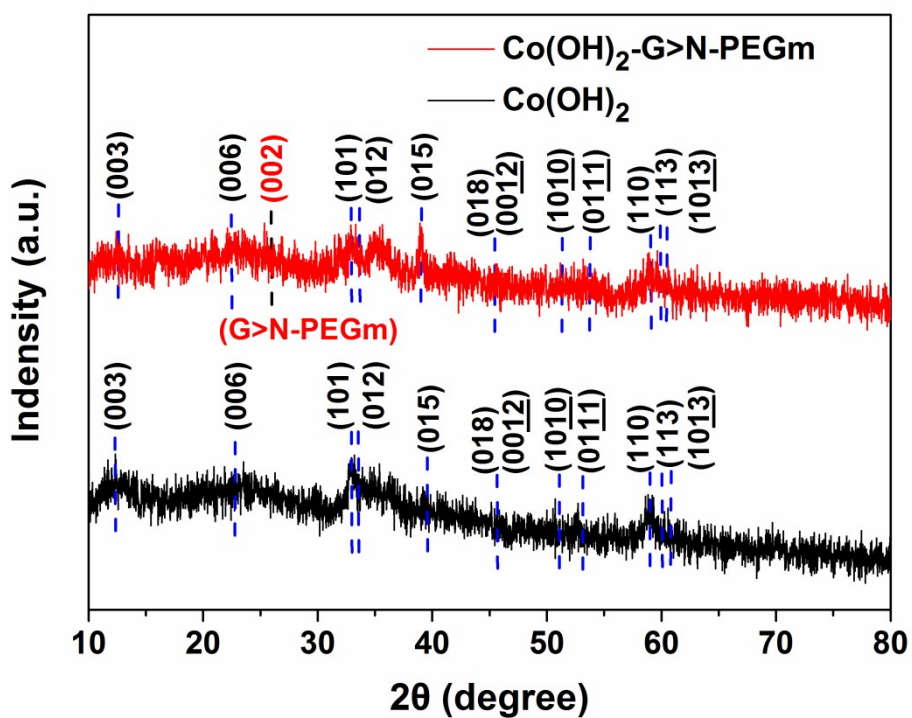

**Figure S5.** XRD patterns of the 3D flower-like hierarchical microspheres of Co(OH)<sub>2</sub> and Co(OH)<sub>2</sub>-G>N-PEGm.

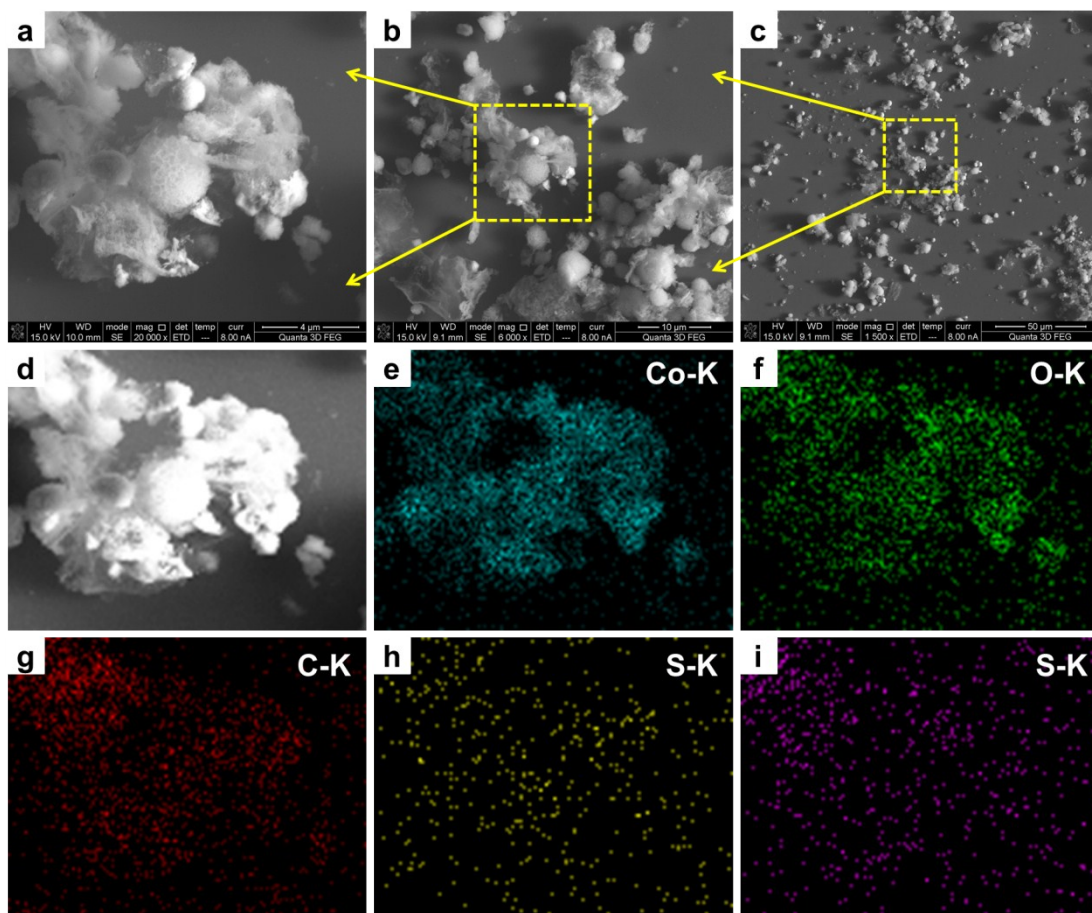

**Figure S6.** (a-c) Different magnification SEM images of Co(OH)<sub>2</sub>-G>N-PEGm, (d-i) the EDS elemental mapping analysis of Co-L, O-K, C-K, S-K, and Cl-K for DBS- $\alpha$ -Co(OH)<sub>2</sub>-G>N-PEGm flower spheres.

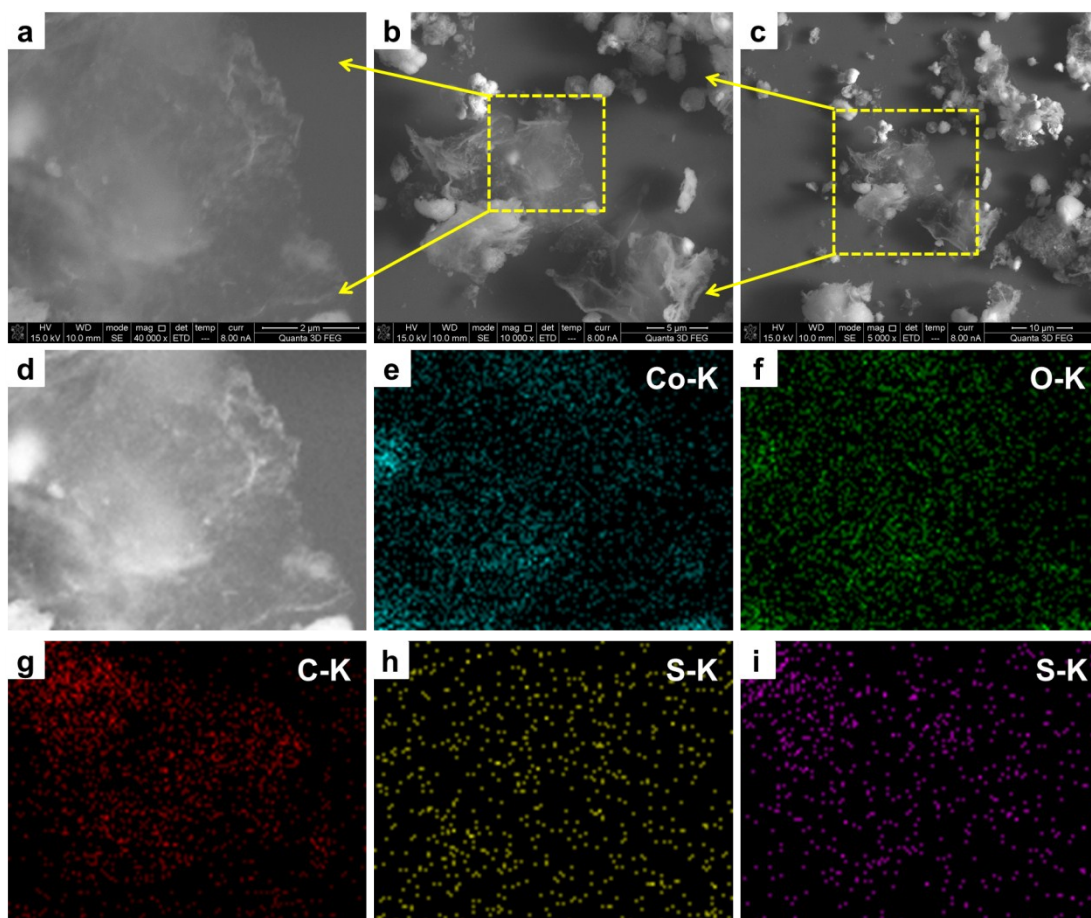

**Figure S7.** (a-c) Different magnification SEM images of G>N-PEGm nanosheets in the  $\text{Co}(\text{OH})_2$ -G>N-PEGm composites, (d-i) the EDS elemental mapping analysis of Co-L, O-K, C-K, S-K, and Cl-K for G>N-PEGm.

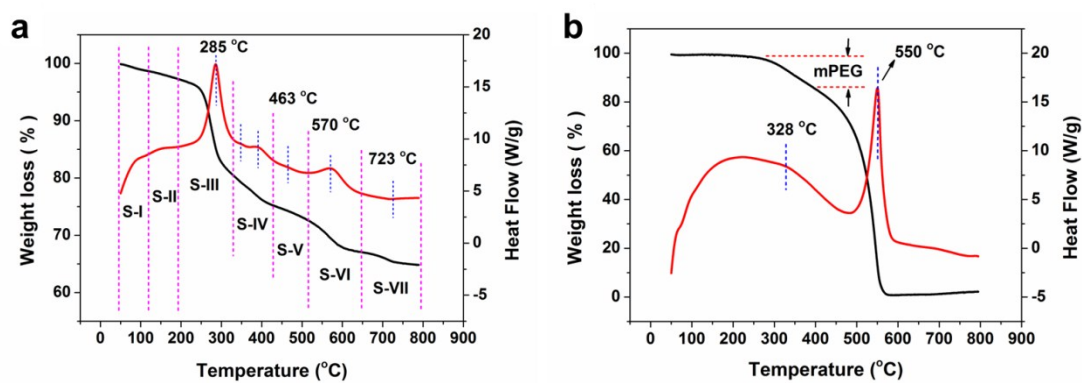

**Figure S8.** (a) TGA-DSC curves of the 3D flower-like hierarchical microspheres DBS- $\text{Co}(\text{OH})_2$ -G>N-PEGm in air. (b) TGA-DSC curves of the G>N-PEGm nanosheets in air.

**Table S1.** Temperature ranges of TGA-DSC curves of the flower microspheres Co(OH)<sub>2</sub>-G>N-PEGm composites in air.

| Stage | Temperature range | Discussion                                             | Chemical reaction | Weight loss range (%) | Weight loss (%) |
|-------|-------------------|--------------------------------------------------------|-------------------|-----------------------|-----------------|
| S-I   | 50-120            | Adsorbed surface water                                 | -                 | 99.9-98.7             | 1.2             |
| S-II  | 120-200           | Intercalated crystallization water                     | C1                | 98.7-97.4             | 1.3             |
| S-III | 200-320           | Thermal oxidative decomposition of Co(OH) <sub>2</sub> | C2                | 97.4-80.5             | 16.9            |
| S-IV  | 320-430           | Thermal oxidation of mPEG (on G>N-PEGm)                | C3                | 80.5-75.3             | 5.2             |
| S-V   | 430-520           | Thermal oxidation of DBS                               | C4                | 75.3-72.6             | 2.7             |
| S-VI  | 520-650           | Thermal oxidation of G                                 | C5                | 72.6-67.1             | 5.5             |
| S-VII | 650-800           | Thermal oxidation of CoSO <sub>4</sub>                 | C6                | 67.1-64.8             | 2.3             |

Chemical reactions in the stages of TGA-DSC curves of the flower microspheres Co(OH)<sub>2</sub>-G>N-PEGm composites in air as follows:

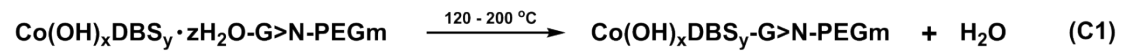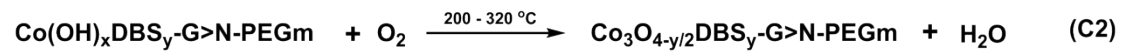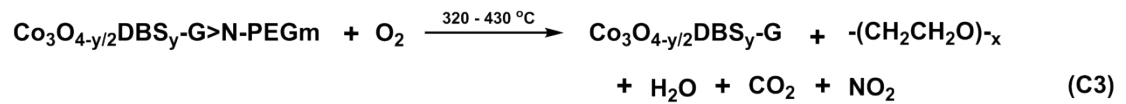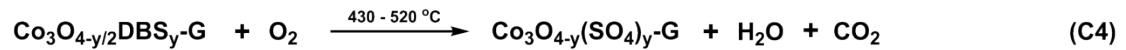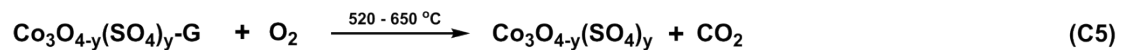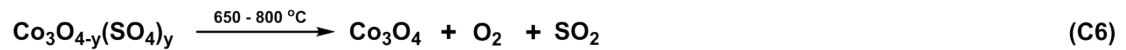

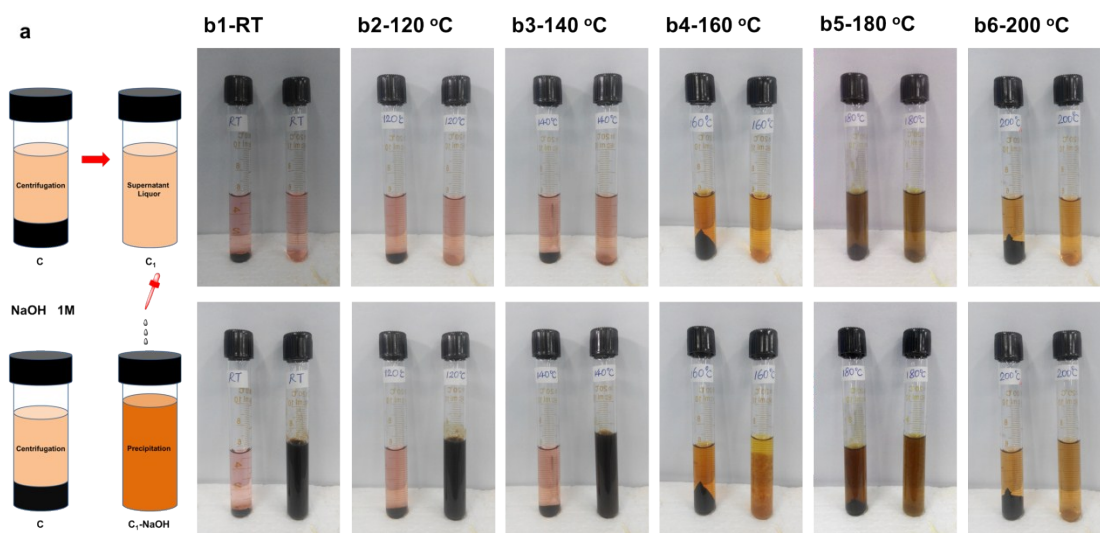

**Figure S9.** (a) Schematic illustration and (b1-b6) photographs of detecting the concentration of  $\text{Co}^{2+}$  ions in the reaction process of precursors.

In **Figure S9a**, the schematic illustration of C,  $C_1$  and  $C_1\text{-NaOH}$  represent the centrifugal sedimentation, clarified centrifugate and sedimentation (by adding NaOH solution) of precursors, respectively. As shown in **Figure S9b1- S9b6**, by the reaction proceeding under different reaction temperatures, the concentration of  $\text{Co}^{2+}$  ions becomes lower gradually, thus indicating to form the  $\text{Co}(\text{OH})_2$  microspheres.



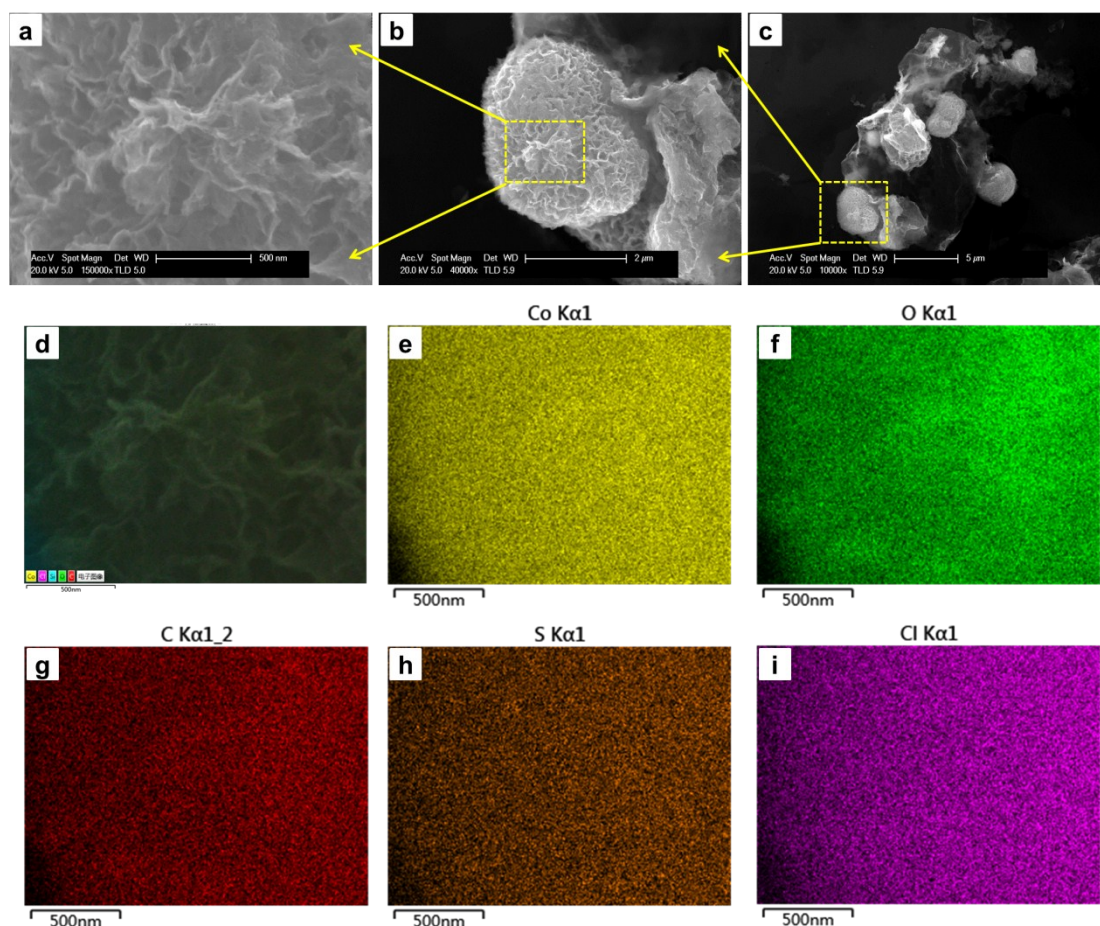

**Figure S10.** (a-c) Different magnification SEM images of  $\text{Co}_3\text{O}_4\text{-G>N-PEGm}$ , (d-i) the EDS elemental mapping analysis of Co-L, O-K, C-K, S-K, and Cl-K for  $\text{Co}_3\text{O}_4\text{-G>N-PEGm}$  flower spheres.

The evenly distributed Co, O, C, S and Cl elements (without Na element else) in the  $\text{Co}_3\text{O}_4\text{-G>N-PEGm}$  flower microspheres can indicate that the DBS-intercalated  $\text{Co}(\text{OH})_2\text{-G>N-PEGm}$  composites have been converted to  $\text{Co}_3\text{O}_4\text{-G>N-PEGm}$  with DBS ions doping in the cobalt spinel oxide (Figure S10d-S10i).

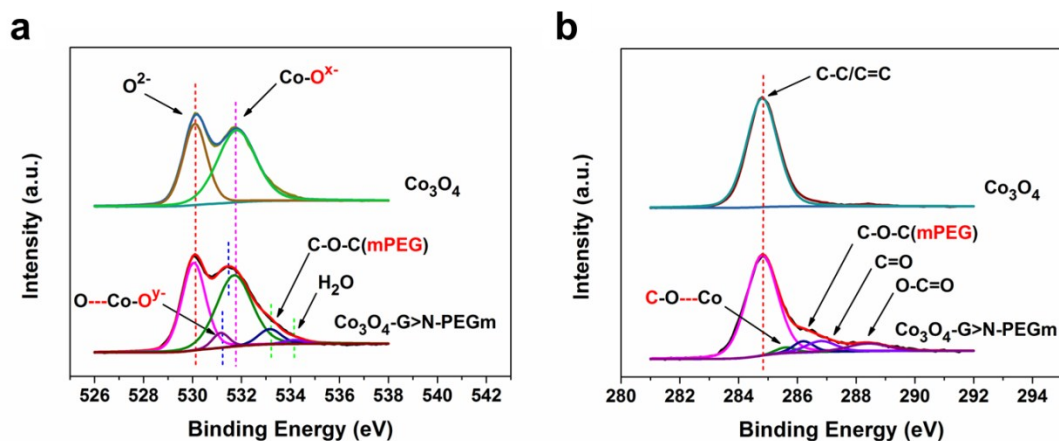

**Figure S11.** (a) O 1s and (b) C 1s XPS spectrum of  $\text{Co}_3\text{O}_4$  and  $\text{Co}_3\text{O}_4\text{-G>N-PEGm}$ .

As shown in **Figure S11b**, it displays four different peaks at 284.8, 286.2, 286.8 and 288.4 eV, which can be respectively ascribed to non oxygenated C ( $\text{C=C/C-C}$ ) in aromatic rings (284.8 eV), C in C-O-C (286.2 eV), C in C=O (286.8 eV) and C in O-C=O (288.4 eV) bonding compared with the bare  $\text{Co}_3\text{O}_4$  flower spheres. The peak at 286.0 eV for  $\text{Co}_3\text{O}_4\text{-G>N-PEGm}$  can be mainly attributed to the ether-oxygen groups (C-O-C) of mPEG polymer chains on G>N-PEGm. It is worthy to note that the peak at 285.6 eV for  $\text{Co}_3\text{O}_4\text{-G>N-PEGm}$  may correspond to  $\text{Co}\leftarrow\text{O-C}$  coordination bonds.

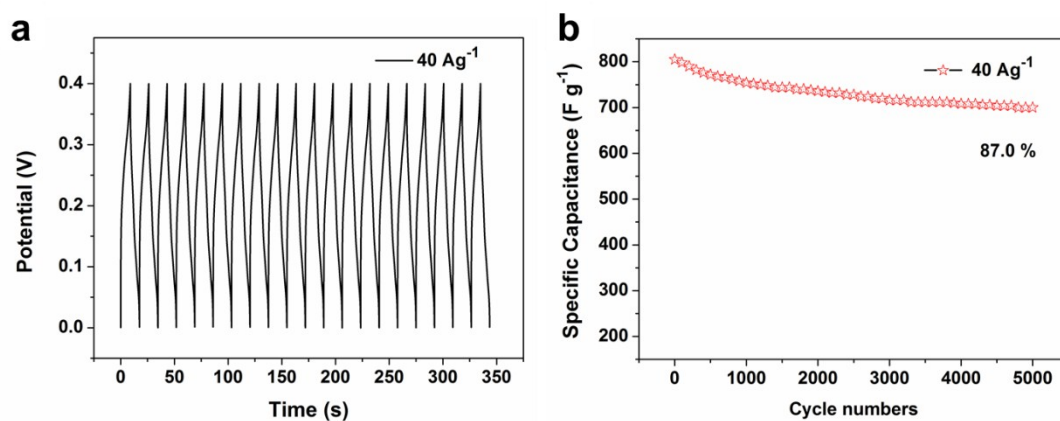

**Figure S12.** The the long-term stability of Co<sub>3</sub>O<sub>4</sub>-G>N-PEGm: (a) the initial 20 times galvanostatic charge-discharge curves, and (b) the cycling performance at a current density of 40 Ag<sup>-1</sup>.

**Table S2.** BET surface area, pore volume, and BJH pore size distribution of Co<sub>3</sub>O<sub>4</sub>-G>N-PEGm-250, Co<sub>3</sub>O<sub>4</sub>-G>N-PEGm-350 and Co<sub>3</sub>O<sub>4</sub>-G>N-PEGm-450.

| Name                                       | BET (m <sup>2</sup> /g) | Pore volume (mL/g) | BJH (nm) |       |
|--------------------------------------------|-------------------------|--------------------|----------|-------|
| Co <sub>3</sub> O <sub>4</sub> -G>PEGm-250 | 107.79                  | 0.52               | 4        | 20-40 |
| Co <sub>3</sub> O <sub>4</sub> -G>PEGm-350 | 96.59                   | 0.47               | 4        | 25-50 |
| Co <sub>3</sub> O <sub>4</sub> -G>PEGm-450 | 73.08                   | 0.44               | 6.5      | 30-65 |

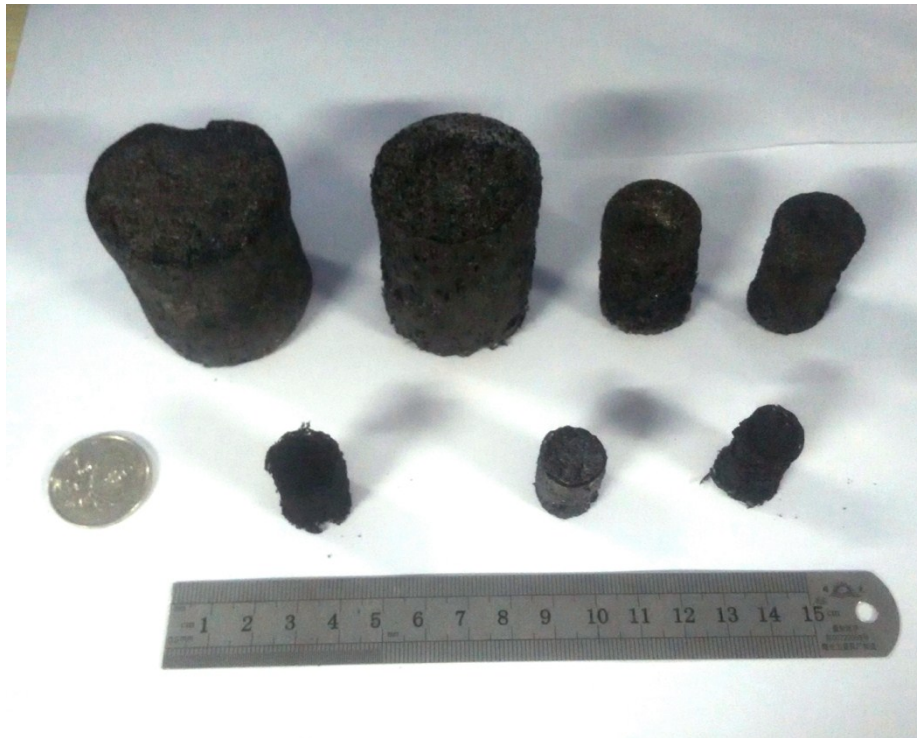

**Figure S13.** Photographs of 3D rGO-CNT>N-PEGm aerogels in different sizes.

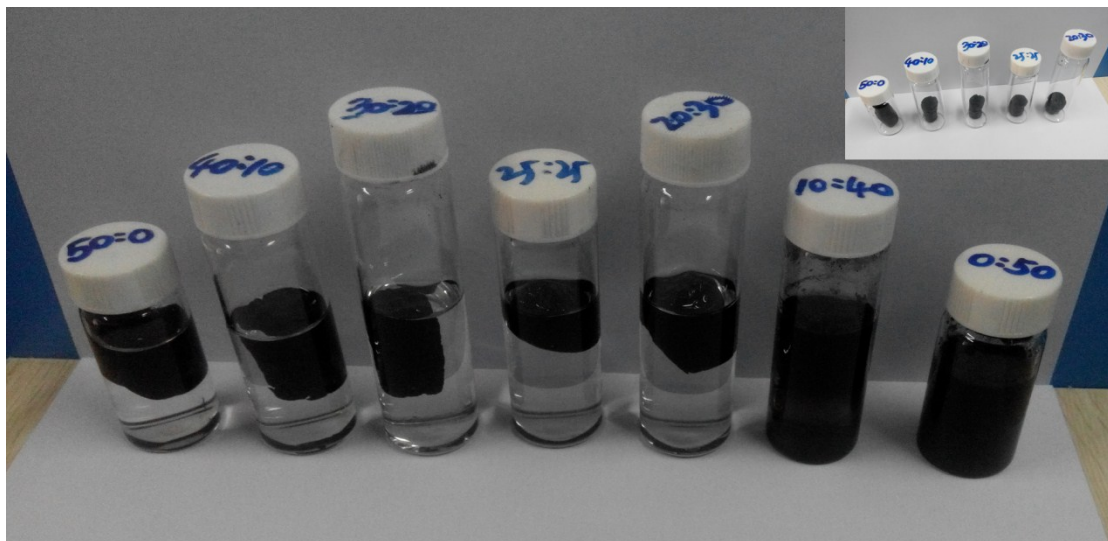

**Figure S14.** Photographs of 3D rGO-CNT>N-PEGm hydrogels in water with different ratios of rGO-CNT>N-PEGm respectively from left to right as shown on samples (the inset without water).

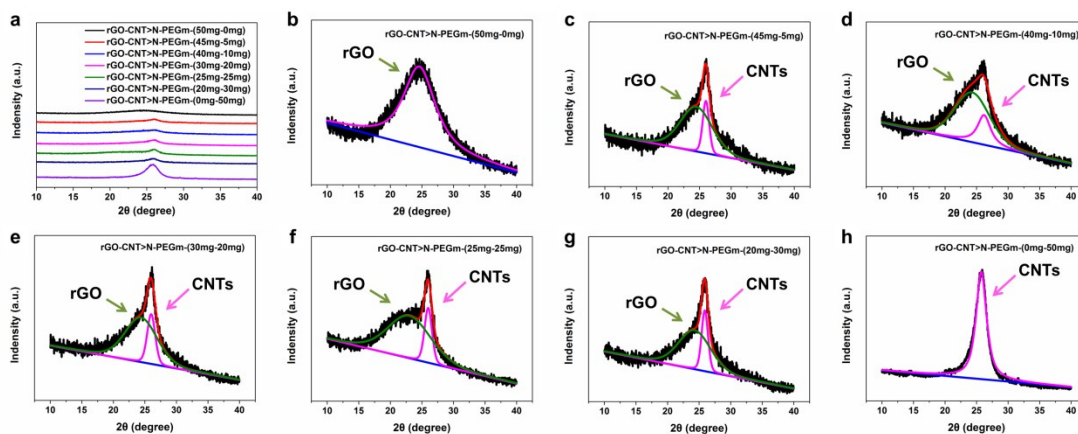

**Figure S15.** (a) XRD patterns of 3D rGO-CNT>N-PEGm aerogels with different mass ratios. (b-h) XRD peaks of 3D rGO-CNT>N-PEGm aerogels with different ratios according to the (002) planes of rGO and CNTs.

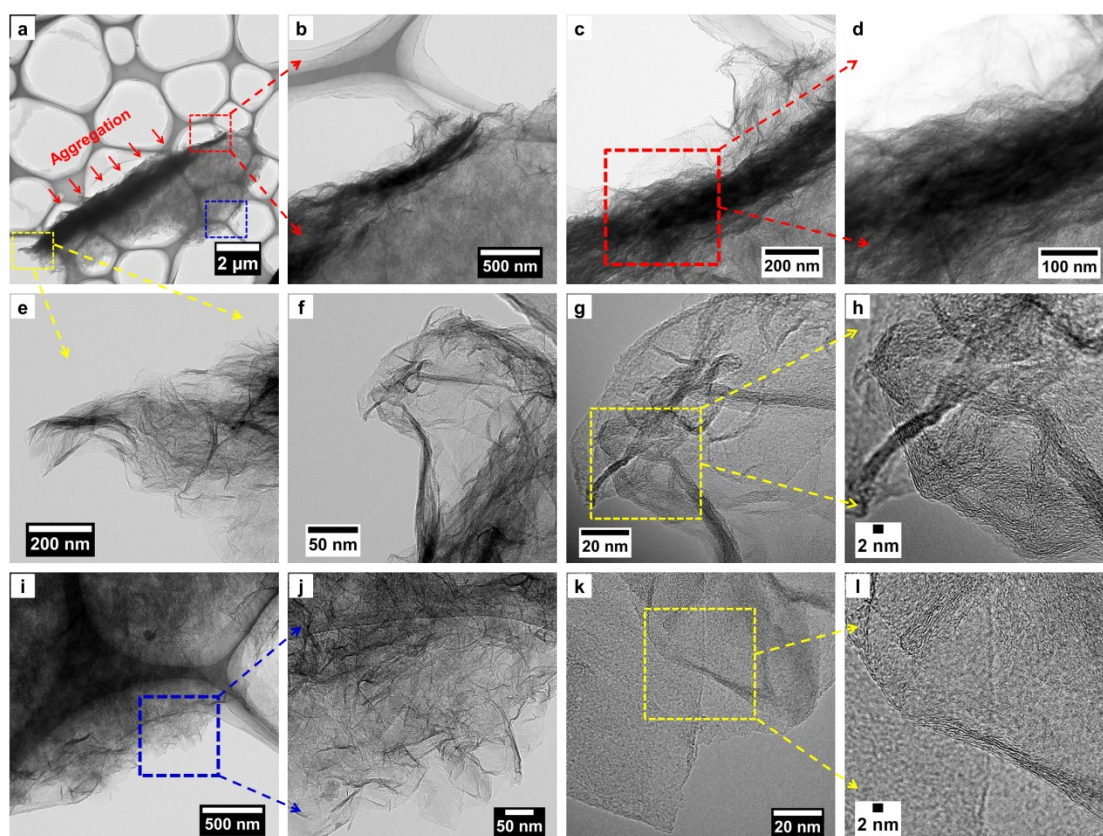

**Figure S16.** (a-f) and (i-j) TEM images of 3D rGO aerogels. (g-h) and (k-l) HRTEM images of 3D rGO aerogels.

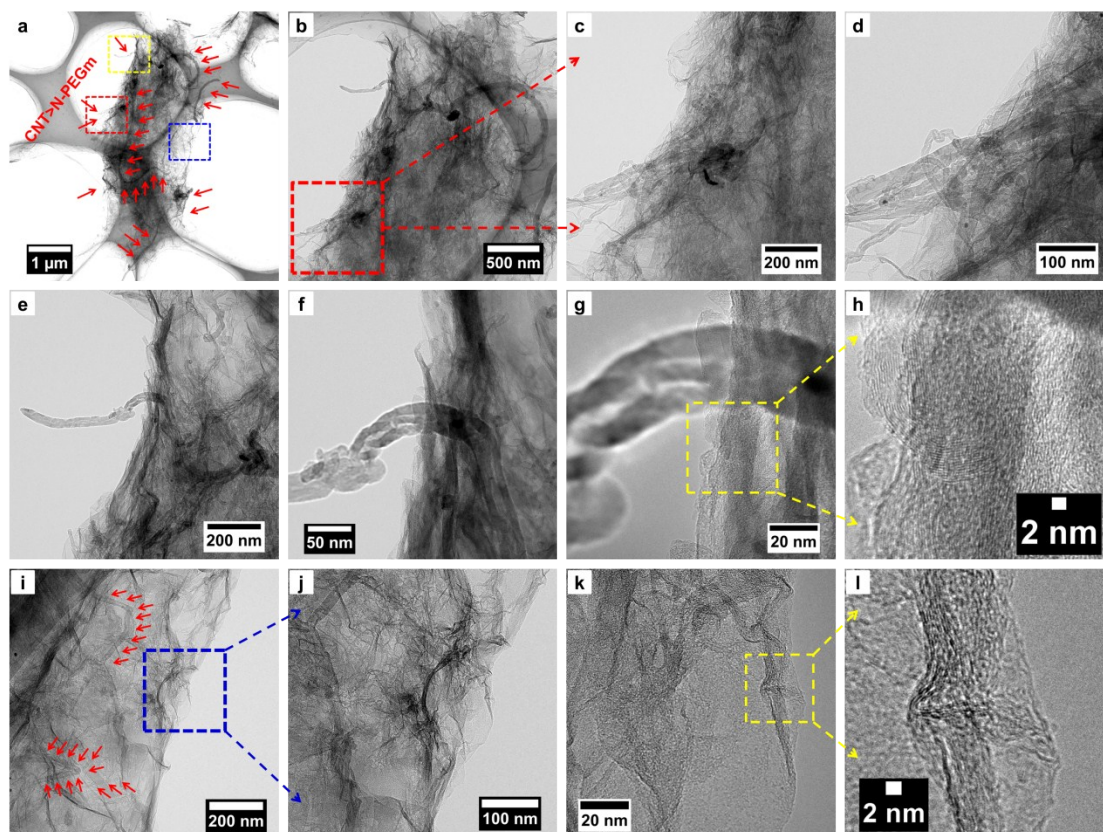

**Figure S17.** (a-f) and (i-j) TEM images of 3D rGO-CNT>N-PEGm aerogels. (g-h) and (k-l) HRTEM images of 3D rGO-CNT>N-PEGm aerogels.

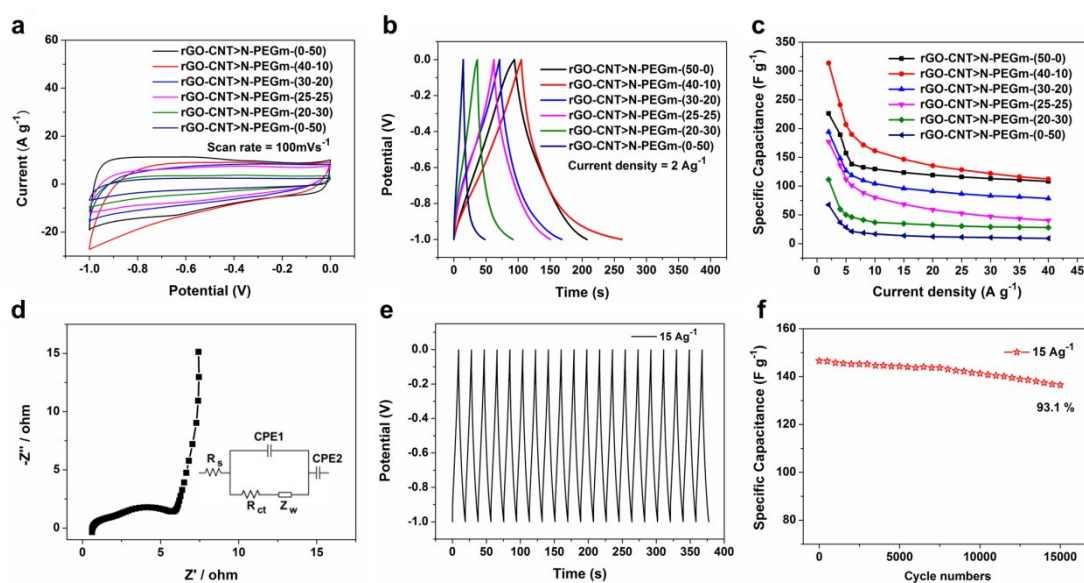

**Figure S18.** The electrochemical properties of 3D rGO-CNT>N-PEGm aerogels with various mass ratios (according to rGO / CNT>N-PEGm): (a) CV curves at a scan rate of 100 mV s<sup>-1</sup>. (b)

Galvanostatic charge-discharge curves at current density of  $2 \text{ A g}^{-1}$ . (c) The specific capacitance at various current densities. The electrochemical properties of 3D rGO-CNT>N-PEGm aerogels (rGO / CNT>N-PEGm = 40:10): (d) Nyquist plots (the inset shows the equivalent circuit), (e) the initial 20 times galvanostatic charge-discharge curves, and (f) the cycling performance at a current density of  $15 \text{ A g}^{-1}$ .

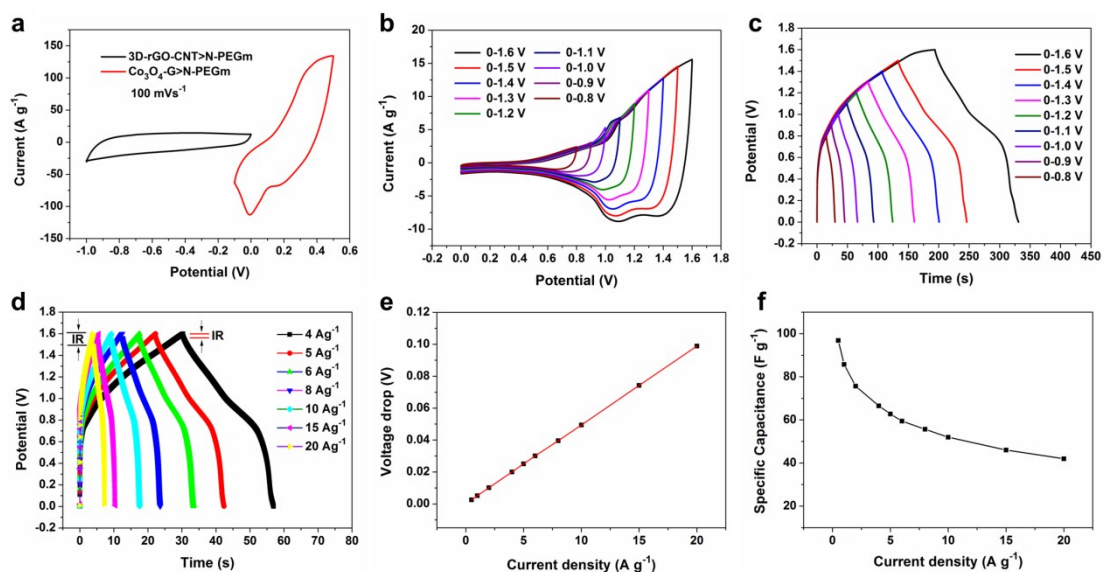

**Figure S19.** (a) CV curves of 3D rGO-CNT>N-PEGm aerogels and  $\text{Co}_3\text{O}_4\text{-G}>\text{N-PEGm}$  electrodes performed in a three-electrode configuration in 6 M KOH solution at a scan rate of  $100 \text{ mV s}^{-1}$ . (b) CV curves of the asymmetric supercapacitors measured at different potential windows (at  $100 \text{ mV s}^{-1}$ ). (c) Galvanostatic charge-discharge curves with the increase of the potential window (at current density of  $1 \text{ A g}^{-1}$ ). (d) The IR drop at the start point of the discharge curves of  $\text{Co}_3\text{O}_4\text{-G}>\text{N-PEGm} // \text{rGO-CNT}>\text{N-PEGm}$  asymmetric supercapacitors. (e) The voltage drop (IR drop) of  $\text{Co}_3\text{O}_4\text{-G}>\text{N-PEGm} // \text{rGO-CNT}>\text{N-PEGm}$  asymmetric supercapacitors. (f) The specific capacitance at various current densities.

**Figure S19b** shows a series of CV curves measured with different potential windows from 0-0.8 V to 0-1.6 V at  $100 \text{ mV s}^{-1}$ . At the operating potential window of 1.0 V, the pseudocapacitive redox-peaks in the region from 0.6 to 1.0 V are attributed to the reversible Faradaic redox reactions of the  $\text{Co}_3\text{O}_4\text{-G}>\text{N-PEGm}$  positive electrode

material. When the operating potential window increases to 1.6 V, more redox reactions occur for the larger current response. In **Figure S19c**, the galvanostatic charge-discharge curves are measured with the increase of the potential window at current density of 1 A g<sup>-1</sup>, which correspond to the CV curves of **Figure S19b** with different potential windows. Moreover, they also combine the pseudocapacitance of Co<sub>3</sub>O<sub>4</sub>-G>N-PEGm and electrical double-layer capacitance of the 3D rGO-CNT>N-PEGm aerogels.



**Table S3.** Comparison of the electrochemical properties of the reported cobalt-based electrodes

| Positive electrode                                                              | morphology (structure)        | Capacitance (F g <sup>-1</sup> ) | Current density (A g <sup>-1</sup> ) | Negative electrode | Energy density (Wh kg <sup>-1</sup> ) | Power density (W Kg <sup>-1</sup> ) | Retention (%) | Cycle numbers | Ref      |
|---------------------------------------------------------------------------------|-------------------------------|----------------------------------|--------------------------------------|--------------------|---------------------------------------|-------------------------------------|---------------|---------------|----------|
| Co <sub>3</sub> O <sub>4</sub> @CoWO <sub>4</sub> /rGO                          | core/shell nanoneedles        | 384.7                            | 0.5                                  | rGO                | 19.1                                  | 531.2                               | 88.8          | 5000          | Ref.1    |
| Co <sub>3</sub> O <sub>4</sub> @MnO <sub>2</sub>                                | core/shell arrays             | 560                              | 0.2                                  | MEGO               | 17.7                                  | 158                                 | 81.1          | 10,000        | Ref.2    |
| Co <sub>3</sub> O <sub>4</sub> -RGO                                             | aerogel                       | 660                              | 0.5                                  | porous carbon      | 40.65                                 | 340                                 | 92.92         | 2000          | Ref.3    |
| Co <sub>3</sub> O <sub>4</sub> /rGO                                             | nanoflakes                    | 1112                             | 3.3                                  | AC                 | 23.3                                  | 2300                                | -             | 20,000        | Ref.4    |
| Co <sub>3</sub> O <sub>4</sub> /Co <sub>3</sub> (VO <sub>4</sub> ) <sub>2</sub> | hybrid nanorods               | 847.2                            | 1                                    | AC                 | 38                                    | 275                                 | 94.7          | 5000          | Ref.5    |
| Ni <sub>x</sub> Co <sub>3-x</sub> O <sub>4</sub>                                | nanowire array                | 1479                             | 1                                    | AC                 | 37.4                                  | 163                                 | 82.8          | 3000          | Ref.6    |
| Co <sub>3</sub> O <sub>4</sub>                                                  | MOF (ZIF-67)                  | 504                              | 5 mVs <sup>-1</sup>                  | nanoporous carbon  | 36                                    | 8000                                | 89            | 2000          | Ref.7    |
| Co <sub>3</sub> O <sub>4</sub> @Ni(OH) <sub>2</sub>                             | core-shell                    | 15.83 F cm <sup>-2</sup>         | 2.5 mA cm <sup>-2</sup>              | rGO                | 41.90                                 | 36.10                               | -             | -             | Ref.8    |
| TiO <sub>2</sub> @C/Co <sub>3</sub> O <sub>4</sub>                              | ternary hybrid nanocomposites | 396.2                            | 1                                    | AC                 | 18.54                                 | 222.56                              | 84.6          | 5000          | Ref.9    |
| NCA/Co <sub>3</sub> O <sub>4</sub>                                              | in situ coating method        | 616                              | 1                                    | carbon aerogel     | 33.43                                 | 375                                 | 92.5          | 5000          | Ref.10   |
| Co <sub>3</sub> O <sub>4</sub> @NiMoO <sub>4</sub>                              | nanocomposites                | 2041                             | 0.5                                  | AC                 | 41.9                                  | -                                   | 68.7          | 1000          | Ref.11   |
| Co <sub>3</sub> O <sub>4</sub> @CoMoO <sub>4</sub>                              | on Ni foam                    | 857                              | 3                                    | -                  | 38                                    | -                                   | 94.2          | -             | -        |
| Co <sub>3</sub> O <sub>4</sub> @NiMoO <sub>4</sub>                              | nanosheets array              | 1526                             | 3 mA cm <sup>-2</sup>                | AC                 | 37.8                                  | 482                                 | -             | -             | Ref.12   |
| Co <sub>3</sub> O <sub>4</sub> /rGO                                             | nanocomposite                 | 636                              | 1                                    | AC                 | 35.7                                  | 225                                 | 95            | 1000          | Ref.13   |
| Co <sub>3</sub> O <sub>4</sub>                                                  | nanowires (on Ni foam)        | 278.4                            | 1                                    | CS aerogel         | 17.9                                  | 750                                 | 85            | 1000          | Ref.14   |
| Co <sub>3</sub> O <sub>4</sub>                                                  | nanowire on Ni foam           | 1217.4                           | 0.7                                  | AC                 | 34                                    | 225                                 | ~87.7         | 1500          | Ref.15   |
| Co <sub>3</sub> O <sub>4</sub>                                                  | hollow tube network           | 1498                             | 0.5                                  | AC                 | 29.5                                  | 104                                 | 91.4          | 1000          | Ref.16   |
| Co <sub>3</sub> O <sub>4</sub> -G>N-PEGm                                        | 3D flower-like microspheres   | 1625.6                           | 0.5                                  | 3D GCA             | 34.4                                  | 400                                 | 84.7          | 10,000        | Our work |

MEGO: activated microwave exfoliated graphite oxide activated graphene.

CS aerogel: carbon aerogel microspheres.

3D GCA: 3D rGO-CNT>N-PEGm aerogels

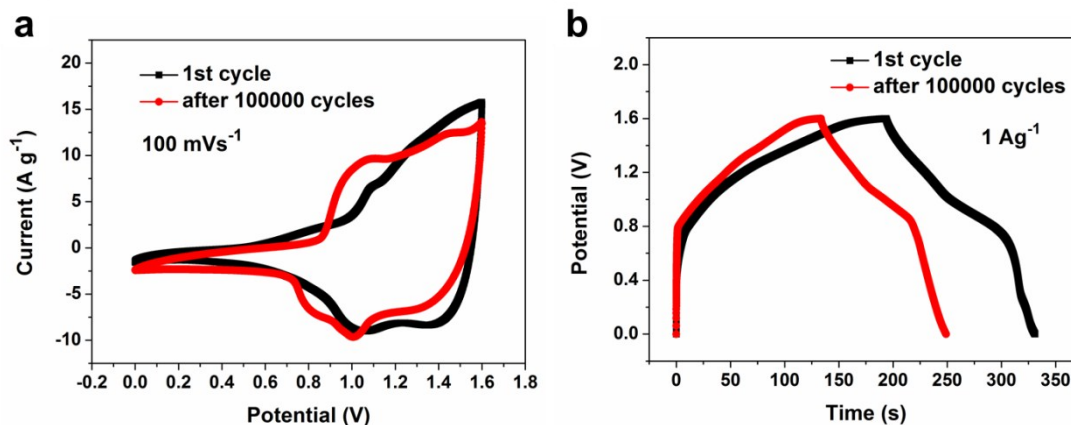

**Figure S20.** The CV curves (at the scan rate of  $100 \text{ mVs}^{-1}$ ) and charge-discharge curves (at the current density of  $1 \text{ Ag}^{-1}$ ) of the 1<sup>st</sup> and 10000<sup>th</sup> cycle for the asymmetric supercapacitors.

## References

- [1] X. Xu, Y. Yang, M. Wang, P. Dong, R. Baines, J. Shen, M. Ye, *Ceram. Int.* **2016**, *42*, 10719.
- [2] M. Huang, Y. Zhang, F. Li, L. Zhang, Z. Wen, Q. Liu, *J. Power Sources* **2014**, *252*, 98.
- [3] L. Xie, F. Su, L. Xie, X. Li, Z. Liu, Q. Kong, X. Guo, Y. Zhang, L. Wan, K. Li, C. Lv, C. Chen, *Chemsuschem* **2015**, *8*, 2917.
- [4] M. Qorbani, T. C. Chou, Y. H. Lee, S. Samireddi, N. Naseri, A. Ganguly, A. Esfandiari, C. H. Wang, L. C. Chen, K. H. Chen, A. Z. Moshfegh, *J. Mater. Chem. A* **2017**, *5*, 12569.
- [5] W. Zhang, L. Kong, X. Ma, Y. Luo, L. Kang, *J. Power Sources* **2014**, *269*, 61.
- [6] X. Wang, C. Yan, A. Sumboja, P. S. Lee, *Nano Energy* **2014**, *3*, 119.
- [7] R. R. Salunkhe, J. Tang, Y. Kamachi, T. Nakato, J. H. Kim, Y. Yamauchi, *ACS nano* **2015**, *9*, 6288.

- [8] C. Tang, X. Yin, H. Gong, *ACS Appl. Mat. Interfaces* **2013**, *5*, 10574.
- [9] M. Kim, J. Choi, I. Oh, J. Kim, *Phys. Chem. Chem. Phys.* **2016**, *18*, 19696.
- [10] G. Sun, L. Ma, J. Ran, X. Shen, H. Tong, *J. Mater. Chem. A* **2016**, *4*, 9542.
- [11] X. Ma, L. Kong, W. Zhang, M. Liu, Y. Luo, L. Kang, *Electrochim. Acta* **2014**, *130*, 660.
- [12] W. Hong, J. Wang, P. Gong, J. Sun, L. Niu, Z. Yang, Z. Wang, S. Yang, *J. Power Sources* **2014**, *270*, 516.
- [13] L. Xie, J. Wu, C. Chen, C. Zhang, L. Wan, J. Wang, Q. Kong, C. Lv, K. Li, G. Sun, *J. Power Sources* **2013**, *242*, 148.
- [14] W. Liu, X. Li, M. Zhu, X. He, *J. Power Sources* **2015**, *282*, 179.
- [15] X. Zhang, Y. Zhao, C. Xu, *Nanoscale* **2014**, *6*, 3638.
- [16] J. Li, G. Zan, Q. Wu, *J. Mater. Chem. A* **2016**, *4*, 9097.
